# Supplementary material for: Wild-Type KRAS Allele Effects on Druggable Targets in KRAS Mutant Lung Adenocarcinomas
Source: MDPI journal article supplement (doi:10.3390/genes12091402), 2021-09-11

**Table S1:** List of antibodies used for RPPA analysis including target proteins, vendor, species, dilution, and p values for two-group comparisons between *KRAS*<sup>mut</sup>/WT<sup>+</sup> and *KRAS*<sup>mut</sup>/WT<sup>-</sup> NSCLC cell lines.

| Antibody                                  | Vendor    | Catalog number | Dilution | Host | p-value          |
|-------------------------------------------|-----------|----------------|----------|------|------------------|
| 4E-BP1 S65                                | CellSig   | 9451           | 1:50     | R    | 0.14             |
| 4E-BP1 T70                                | CellSig   | 9455           | 1:200    | R    | 0.32             |
| Acetyl-CoA Carboxylase S79                | CellSig   | 3661           | 1:50     | R    | <b>&lt; 0.01</b> |
| AKT S473                                  | CellSig   | 9271           | 1:100    | R    | 0.16             |
| Alk                                       | CellSig   | 3633           | 1:50     | R    | <b>&lt; 0.01</b> |
| Alk 1604                                  | CellSig   | 3341           | 1:50     | R    | 0.20             |
| AMPK alpha T172                           | CellSig   | 4188           | 1:2000   | R    | 0.20             |
| AMPK alpha1 S485                          | CellSig   | 4184           | 1:50     | R    | 0.75             |
| AMPK beta1 S108                           | CellSig   | 4181           | 1:50     | R    | 0.17             |
| Androgen Receptor S81                     | Millipore | 07-1375        | 1:1000   | R    | 0.41             |
| A-Raf S299                                | CellSig   | 4431           | 1:50     | R    | 0.10             |
| ATF-2 T69/71                              | CellSig   | 9225           | 1:500    | R    | 0.19             |
| ATG5                                      | CellSig   | 2630           | 1:1000   | R    | 0.59             |
| ATG12                                     | CellSig   | 2010           | 1:100    | R    | 0.52             |
| ATM S1981                                 | CellSig   | 5883           | 1:50     | R    | <b>&lt; 0.01</b> |
| ATP-Citrate Lyase S454                    | CellSig   | 4331           | 1:100    | R    | 0.20             |
| ATR S428                                  | CellSig   | 2853           | 1:50     | R    | 0.08             |
| Aurora A T288/Aurora B T232/Aurora C T198 | CellSig   | 2914           | 1:50     | R    | 0.39             |
| Axl Y702                                  | CellSig   | 5724           | 1:50     | R    | <b>&lt; 0.01</b> |
| BAD S112                                  | CellSig   | 9291           | 1:200    | R    | <b>&lt; 0.01</b> |
| BAD S136                                  | CellSig   | 9295           | 1:50     | R    | 0.05             |
| BAD S155                                  | CellSig   | 9297           | 1:100    | R    | 0.92             |
| Bak                                       | CellSig   | 3814           | 1:100    | R    | <b>&lt; 0.01</b> |
| Bax                                       | CellSig   | 2772           | 1:200    | R    | 0.05             |
| Bcl-2 S70                                 | CellSig   | 2827           | 1:50     | R    | 0.97             |
| Bcl-2 T56                                 | CellSig   | 2875           | 1:200    | R    | 0.72             |
| Bcl-xL                                    | CellSig   | 2762           | 1:500    | R    | 0.95             |
| Beclin1                                   | CellSig   | 3738           | 1:100    | R    | <b>0.03</b>      |
| BIM                                       | CellSig   | 2933           | 1:500    | R    | 0.13             |
| B-Raf S445                                | CellSig   | 2696           | 1:50     | R    | <b>&lt; 0.01</b> |
| c-Met                                     | Abcam     | ab51067        | 1:200    | R    | 0.96             |
| c-Abl T735                                | CellSig   | 2864           | 1:50     | R    | 1.00             |
| c-Abl Y245                                | CellSig   | 2861           | 1:100    | R    | <b>&lt; 0.01</b> |
| Caspase-3, cleaved (D175)                 | CellSig   | 9661           | 1:50     | R    | 0.96             |

|                                     |           |        |        |   |                  |
|-------------------------------------|-----------|--------|--------|---|------------------|
| Caspase-6, cleaved (D162)           | CellSig   | 9761   | 1:50   | R | 0.15             |
| Caspase-7, cleaved (D198)           | CellSig   | 9491   | 1:100  | R | 0.40             |
| Caspase-9, cleaved (D330)           | CellSig   | 9501   | 1:50   | R | <b>&lt; 0.01</b> |
| Catenin beta S33/37/T41             | CellSig   | 9561   | 1:100  | R | 0.12             |
| Chk1 S345                           | CellSig   | 2341   | 1:50   | R | <b>0.04</b>      |
| Chk2 S33/35                         | CellSig   | 2665   | 1:50   | R | 0.40             |
| Cofilin S3                          | CellSig   | 3313   | 1:500  | R | <b>&lt; 0.01</b> |
| Cox-2                               | BD        | 610203 | 1:200  | M | <b>&lt; 0.01</b> |
| cPLA2 S505                          | CellSig   | 2831   | 1:1000 | R | <b>0.02</b>      |
| C-Raf S338                          | CellSig   | 9427   | 1:200  | R | <b>&lt; 0.01</b> |
| CREB S133                           | CellSig   | 9191   | 1:100  | R | 0.98             |
| CrkL Y207                           | CellSig   | 3181   | 1:100  | R | <b>0.03</b>      |
| Cyclin A2                           | CellSig   | 4656   | 1:50   | M | <b>0.03</b>      |
| Cyclin B1                           | CellSig   | 4135   | 1:200  | M | 0.11             |
| Cyclin D1                           | BD        | 554180 | 1:100  | M | <b>0.04</b>      |
| EGFR                                | CellSig   | 2232   | 1:100  | R | 0.52             |
| EGFR Y1045                          | CellSig   | 2237   | 1:50   | R | 0.29             |
| EGFR Y1068                          | CellSig   | 2234   | 1:50   | R | 0.88             |
| EGFR Y1148                          | BioSource | 44-792 | 1:100  | R | <b>0.02</b>      |
| EGFR Y1173                          | BioSource | 44-794 | 1:100  | R | 0.16             |
| eIF4E S209                          | CellSig   | 9741   | 1:50   | R | 0.22             |
| eIF4G S1108                         | CellSig   | 2441   | 1:1000 | R | 0.27             |
| Elk-1 S383                          | CellSig   | 9181   | 1:100  | R | <b>0.03</b>      |
| eNOS S113                           | CellSig   | 9575   | 1:50   | R | 0.46             |
| eNOS/NOS III S116                   | Upstate   | 07-357 | 1:500  | R | <b>&lt; 0.01</b> |
| Ephrin A3 Y799/A4 Y799/A5 Y833      | Abcam     | 124881 | 1:100  | R | 0.93             |
| ERK 1/2 T202/Y204                   | CellSig   | 9101   | 1:1000 | R | <b>0.04</b>      |
| Estrogen Receptor alpha             | CellSig   | 2511   | 1:1000 | M | 0.26             |
| Estrogen Receptor alpha S118        | CellSig   | 2511   | 1:1000 | M | 0.11             |
| Etk Y40                             | CellSig   | 3211   | 1:2000 | R | 0.17             |
| Ezrin T567/Radixin T564/Moesin T558 | CellSig   | 3141   | 1:100  | R | <b>&lt; 0.01</b> |
| FADD S194                           | CellSig   | 2781   | 1:100  | R | <b>&lt; 0.01</b> |
| FAK Y576/577                        | CellSig   | 3281   | 1:200  | R | <b>&lt; 0.01</b> |
| FOXO1 T24/FOXO3 T32                 | CellSig   | 9464   | 1:200  | R | <b>&lt; 0.01</b> |
| FOXO3 S253                          | Upstate   | 06-953 | 1:1000 | R | 0.06             |
| FOXO1 T600                          | CellSig   | 14655  | 1:100  | R | <b>&lt; 0.01</b> |
| FOXO1 S256                          | CellSig   | 9461   | 1:100  | R | <b>&lt; 0.01</b> |
| Grb2                                | CellSig   | 3972   | 1:1000 | R | 0.36             |
| GSK-3 alpha/beta S21/9              | CellSig   | 9331   | 1:100  | R | 0.96             |
| HDAC 1                              | CellSig   | 2062   | 1:100  | R | <b>&lt; 0.01</b> |

|                                 |           |           |        |   |                  |
|---------------------------------|-----------|-----------|--------|---|------------------|
| HDAC 3                          | CellSig   | 2632      | 1:1000 | R | <b>0.01</b>      |
| HDAC 4                          | CellSig   | 2072      | 1:100  | R | <b>&lt; 0.01</b> |
| HDAC 6                          | SantaCruz | sc-11420  | 1:2000 | R | <b>0.04</b>      |
| HER2                            | DAKO      | A0485     | 1:250  | R | 0.35             |
| HER2 Y1248                      | Imgenex   | IMG-90189 | 1:500  | R | 0.86             |
| HER3 Y1197                      | CellSig   | 4561      | 1:100  | R | <b>&lt; 0.01</b> |
| HER3 Y1289                      | CellSig   | 4791      | 1:200  | R | 0.91             |
| Histone H3, Acetyl Lys9 14      | CellSig   | 9677      | 1:2000 | R | 0.22             |
| Histone H3, Di-Methyl Lys9      | CellSig   | 9753      | 1:500  | R | 0.30             |
| Histone H3, Pan-Methyl Lys9     | CellSig   | 4069      | 1:100  | R | <b>&lt; 0.01</b> |
| Histone H3 S10                  | Upstate   | 06-570    | 1:200  | R | <b>0.02</b>      |
| Histone H3 S28                  | Upstate   | 07-145    | 1:1000 | R | 0.28             |
| Histone H4 Acetyl Lys8          | CellSig   | 2594      | 1:200  | R | <b>&lt; 0.01</b> |
| HSP27 S82                       | CellSig   | 2406      | 1:100  | R | 0.22             |
| HSP90a T5/7                     | CellSig   | 3488      | 1:100  | R | 0.34             |
| IGF-1R Y1131 IR Y1146           | CellSig   | 3021      | 1:500  | R | 0.07             |
| IGF-1R Y1135/1136 IR Y1150/1151 | CellSig   | 3024      | 1:500  | R | 0.85             |
| IkappaB-alpha S32/36            | CellSig   | 9246      | 1:100  | M | <b>&lt; 0.01</b> |
| IL-8                            | Abcam     | ab7747    | 1:200  | R | 0.88             |
| IL-10                           | Abcam     | ab52909   | 1:2000 | R | 0.06             |
| IL-11                           | SantaCruz | sc-7924   | 1:500  | R | 0.06             |
| Insulin Receptor beta           | CellSig   | 3025      | 1:200  | R | 0.23             |
| IRS-1 S612                      | CellSig   | 2386      | 1:200  | R | 0.66             |
| Jak1 Y1022/1023                 | CellSig   | 3331      | 1:50   | R | <b>0.01</b>      |
| Ki67                            | DAKO      | M7240     | 1:100  | M | <b>&lt; 0.01</b> |
| LC3B                            | CellSig   | 2775      | 1:100  | R | 0.22             |
| Lck Y505                        | Biosource | 44-850    | 1:50   | R | 0.07             |
| LIMK1 T508/LIMK2 T505           | CellSig   | 3841      | 1:100  | R | 0.82             |
| LKB1 S334                       | CellSig   | 3055      | 1:50   | R | <b>0.02</b>      |
| LKB1 S428                       | CellSig   | 3051      | 1:100  | R | 0.39             |
| MARCKS S152/156                 | CellSig   | 2741      | 1:200  | R | 0.11             |
| MDM2 S166                       | CellSig   | 3521      | 1:100  | R | 0.98             |
| MEK 1/2 S217/221                | CellSig   | 9121      | 1:200  | R | <b>&lt; 0.01</b> |
| Met Y1234/1235                  | CellSig   | 3126      | 1:200  | R | <b>&lt; 0.01</b> |
| MSK1 S360                       | CellSig   | 9594      | 1:50   | R | 0.65             |
| mTOR S2448                      | CellSig   | 2971      | 1:100  | R | <b>&lt; 0.01</b> |
| NF-kappaB p65 S536              | CellSig   | 3031      | 1:100  | R | <b>&lt; 0.01</b> |
| p27/Kip1                        | BD        | 610242    | 1:100  | M | <b>&lt; 0.01</b> |
| p27 T187                        | Zymed     | 71-7700   | 1:200  | R | <b>0.02</b>      |
| p38 MAP Kinase T180/Y182        | CellSig   | 9211      | 1:100  | R | 0.88             |

|                               |           |         |        |   |                  |
|-------------------------------|-----------|---------|--------|---|------------------|
| p53                           | CellSig   | 9282    | 1:5000 | R | 0.13             |
| p53 S15                       | CellSig   | 9284    | 1:1000 | R | <b>&lt; 0.01</b> |
| p62/SQSTM1                    | CellSig   | 8025    | 1:50   | R | <b>&lt; 0.01</b> |
| p70 S6 Kinase S371            | CellSig   | 9208    | 1:50   | R | 0.63             |
| p70 S6 Kinase T389            | CellSig   | 9205    | 1:100  | R | <b>&lt; 0.01</b> |
| p70 S6 Kinase T412            | Upstate   | 07-018  | 1:500  | R | <b>&lt; 0.01</b> |
| p90RSK S380                   | CellSig   | 9341    | 1:200  | R | 0.32             |
| p90RSK T359/S363              | CellSig   | 9344    | 1:200  | R | 0.88             |
| PAK1 S199/204 PAK2 S192/197   | CellSig   | 2605    | 1:50   | R | <b>0.04</b>      |
| PAK1 T423/PAK2 T402           | CellSig   | 2601    | 1:100  | R | 0.29             |
| PARP, cleaved (D214)          | CellSig   | 9541    | 1:100  | R | <b>&lt; 0.01</b> |
| Paxillin Y118                 | CellSig   | 2541    | 1:500  | R | <b>0.01</b>      |
| PDGF Receptor beta Y751       | CellSig   | 3161    | 1:50   | R | 0.24             |
| PDK1 S241                     | CellSig   | 3061    | 1:200  | R | <b>0.03</b>      |
| PDL1 E1L3N                    | CellSig   | 13684   | 1:500  | R | 0.13             |
| PI3 Kinase p110gamma          | CellSig   | 4252    | 1:100  | R | <b>0.01</b>      |
| PIAS1                         | CellSig   | 3550    | 1:100  | R | 0.39             |
| PKA C T197                    | CellSig   | 4781    | 1:200  | R | 0.17             |
| PKC $\alpha$ /BII T638/641    | CellSig   | 9375    | 1:100  | R | 0.39             |
| PKC $\alpha$ S657             | Upstate   | 06-822  | 1:1000 | R | 0.98             |
| PKC $\delta$ T505             | CellSig   | 9374    | 1:50   | R | 0.08             |
| PKC $\theta$ T538             | CellSig   | 9377    | 1:100  | R | <b>&lt; 0.01</b> |
| PKC $\zeta$ /lambda T410/403  | CellSig   | 9378    | 1:50   | R | 0.40             |
| PLCgamma1 Y783                | CellSig   | 2821    | 1:100  | R | 0.57             |
| PLK1 T210                     | BD        | 558400  | 1:200  | M | 0.57             |
| PP2A A Subunit                | CellSig   | 2039    | 1:1000 | R | <b>&lt; 0.01</b> |
| PP2A B Subunit                | CellSig   | 4953    | 1:1000 | R | <b>0.03</b>      |
| PRAS40 T246                   | BioSource | 44-1100 | 1:1000 | R | 0.13             |
| PTEN                          | CellSig   | 9552    | 1:50   | R | 0.39             |
| PTEN S380                     | CellSig   | 9551    | 1:500  | R | 0.72             |
| Pyk2 Y402                     | CellSig   | 3291    | 1:200  | R | <b>&lt; 0.01</b> |
| Raf S259                      | CellSig   | 9421    | 1:100  | R | <b>&lt; 0.01</b> |
| Ras-GRF1                      | CellSig   | 3322    | 1:200  | R | <b>&lt; 0.01</b> |
| Ras-GRF1 S916                 | CellSig   | 3321    | 1:50   | R | 0.09             |
| Rb S780                       | CellSig   | 3590    | 1:2000 | R | <b>0.02</b>      |
| Ret Y905                      | CellSig   | 3221    | 1:100  | R | 0.92             |
| Ron Y1353                     | Epitomics | 5176-1  | 1:1000 | R | 0.20             |
| RSK3 T356/S360                | CellSig   | 9348    | 1:500  | R | <b>&lt; 0.01</b> |
| S6 Ribosomal Protein S235/236 | CellSig   | 4856    | 1:200  | R | 0.25             |
| S6 Ribosomal Protein S240/244 | CellSig   | 2215    | 1:1000 | R | 0.22             |

|                    |           |        |        |   |                  |
|--------------------|-----------|--------|--------|---|------------------|
| SAPK/JNK T183/Y185 | CellSig   | 9251   | 1:100  | R | <b>0.03</b>      |
| SEK1/MKK4 S80      | CellSig   | 9155   | 1:50   | R | <b>&lt; 0.01</b> |
| SGK1 S78           | CellSig   | 5599   | 1:100  | R | 0.46             |
| Shc Y317           | Upstate   | 07-206 | 1:200  | R | <b>&lt; 0.01</b> |
| SHIP1 Y1020        | CellSig   | 3941   | 1:50   | R | 0.40             |
| SHP2 Y580          | Biosource | 44-558 | 1:500  | R | <b>&lt; 0.01</b> |
| Smad2 S245/250/255 | CellSig   | 3104   | 1:100  | R | <b>&lt; 0.01</b> |
| Smad2 S465/467     | CellSig   | 3101   | 1:200  | R | <b>&lt; 0.01</b> |
| SOCS3              | CellSig   | 2923   | 1:50   | R | 0.78             |
| SOCS1              | CellSig   | 3950   | 1:50   | R | <b>&lt; 0.01</b> |
| Src Family Y416    | CellSig   | 2101   | 1:100  | R | <b>&lt; 0.01</b> |
| Src Y527           | CellSig   | 2105   | 1:200  | R | <b>&lt; 0.01</b> |
| Stat1 Y701         | CellSig   | 9171   | 1:500  | R | 0.79             |
| Stat2 Y690         | CellSig   | 4441   | 1:100  | R | 0.79             |
| Stat3 Y705         | CellSig   | 9145   | 1:100  | R | <b>&lt; 0.01</b> |
| Stat3 S727         | CellSig   | 9134   | 1:100  | R | 0.07             |
| Stat4 Y693         | CellSig   | 5267   | 1:100  | R | <b>&lt; 0.01</b> |
| Stat5 Y694         | CellSig   | 9351   | 1:50   | R | 0.09             |
| Stat6 Y641         | CellSig   | 9361   | 1:100  | R | 0.22             |
| Survivin           | CellSig   | 2808   | 1:500  | R | 0.20             |
| Syk Y525/526       | CellSig   | 2711   | 1:50   | R | <b>&lt; 0.01</b> |
| TGF-Beta           | CellSig   | 3709   | 1:1000 | R | <b>0.03</b>      |
| TNF alpha          | Abcam     | ab9635 | 1:200  | R | <b>&lt; 0.01</b> |
| TNF-R1             | CellSig   | 3736   | 1:50   | R | <b>0.03</b>      |
| Tubulin alpha      | Sigma     | T 6074 | 1:2000 | M | <b>&lt; 0.01</b> |
| Tyk2               | CellSig   | 9312   | 1:200  | R | 0.66             |
| VASP S157          | CellSig   | 3111   | 1:100  | R | 0.72             |
| XIAP               | CellSig   | 2042   | 1:100  | R | <b>0.02</b>      |
| YAP S127           | CellSig   | 13008  | 1:100  | R | <b>&lt; 0.01</b> |

**Figure S1:** Bar graphs illustrating phosphorylation levels of apoptotic proteins on residues regulating proteins cytosolic sequestration and inactivation in *KRAS*<sup>m</sup>/WT<sup>-</sup> and *KRAS*<sup>m</sup>/WT<sup>+</sup> adenocarcinoma cell lines.

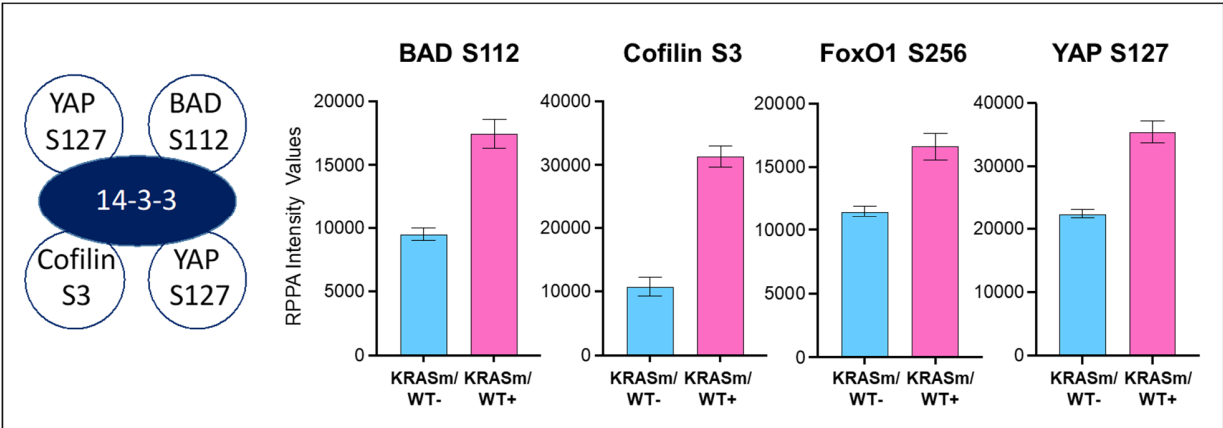

Supplement: s1 [file s1]
